## Correction: Ten Simple Rules for Selecting a Postdoctoral Position

Philip E. Bourne, Iddo Friedberg

doi: 10.1371/journal.pcbi.0020121

In *PLoS Computational Biology*, volume 2, issue 11:

In the author affiliation section, Dr. Iddo Friedberg should have been listed as a research scientist (instead of as a research assistant).

In the section called **Rule 1: Select a Position That Excites You**, the sentence, “Just because the mentor is excited about the project does not mean that you will be six months into it.”, had the two words “that” and “you” switched.

This correction note may be found online at doi:10.1371/journal.pcbi.0020181.

Published December 29, 2006.

Citation: (2006) Correction: Ten simple rules for selecting a postdoctoral position. *PLoS Comput Biol* 2(12): e181. doi:10.1371/journal.pcbi.0020181

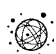

Source: http://www.ploscompbiol.org/article/fetchObject.action?uri=info:doi/10.1371/journal.pcbi.0020181&representation=PDF
